# Supplementary material for: Beyond static structures: Putting forth REMD as a tool to solve problems in computational organic chemistry
Source: PubMed Central journal article supplement — J Comput Chem. 2015 Jul 31;37(1):83–92. doi: 10.1002/jcc.24025 (PMC5324590; doi:10.1002/jcc.24025), 2015-07-31
Supplement: JCC-37-83-s001.pdf [file JCC-37-83-s001.pdf]

SUPPORTING INFORMATION

**Beyond Static Structures: Putting Forth REMD as a Tool to  
Solve Problems in Computational Organic Chemistry**

Riccardo Petraglia,<sup>1</sup> Adrien Nicolai,<sup>1</sup> Matthew D. Wodrich,<sup>1</sup> Michele Ceriotti,<sup>\*2</sup>

Clemence Corminboeuf<sup>\*1</sup>

<sup>1</sup>Laboratory for Computational Molecular Design, Institut des Sciences et Ingénierie Chimiques, Ecole Polytechnique Fédérale de Lausanne, CH-1015 Lausanne, Switzerland

<sup>2</sup>Laboratory of Computational Science and Modelling, Institut des Matériaux, Ecole Polytechnique Fédérale de Lausanne, CH-1015 Lausanne, Switzerland

**Table S1.** Temperatures used in the replica exchange molecular dynamics simulations.

| Replica Number | Temperature for Diathiacyclophane and Cope rearrangement | Temperature for molecular rotor and Cinchona alkaloid |
|----------------|----------------------------------------------------------|-------------------------------------------------------|
| 1              | 300.00                                                   | 300.00                                                |
| 2              | 333.98                                                   | 310.45                                                |
| 3              | 371.81                                                   | 321.27                                                |
| 4              | 413.93                                                   | 332.46                                                |
| 5              | 460.81                                                   | 344.04                                                |
| 6              | 513.01                                                   | 356.03                                                |
| 7              | 571.12                                                   | 368.43                                                |
| 8              | 635.81                                                   | 381.27                                                |
| 9              | 707.83                                                   | 394.55                                                |
| 10             | 788.01                                                   | 408.30                                                |
| 11             | 877.26                                                   | 422.52                                                |
| 12             | 976.63                                                   | 437.24                                                |
| 13             | 1087.26                                                  | 452.47                                                |
| 14             | 1210.41                                                  | 468.24                                                |
| 15             | 1347.51                                                  | 484.55                                                |
| 16             | 1500.15                                                  | 501.43                                                |
| 17             | NA                                                       | 518.90                                                |
| 18             | NA                                                       | 536.98                                                |
| 19             | NA                                                       | 555.68                                                |
| 20             | NA                                                       | 575.04                                                |
| 21             | NA                                                       | 595.08                                                |
| 22             | NA                                                       | 615.81                                                |
| 23             | NA                                                       | 637.26                                                |
| 24             | NA                                                       | 659.46                                                |
| 25             | NA                                                       | 682.44                                                |
| 26             | NA                                                       | 706.21                                                |
| 27             | NA                                                       | 730.82                                                |
| 28             | NA                                                       | 756.28                                                |
| 29             | NA                                                       | 782.63                                                |
| 30             | NA                                                       | 809.89                                                |
| 31             | NA                                                       | 838.11                                                |
| 32             | NA                                                       | 867.31                                                |
| 33             | NA                                                       | 897.52                                                |
| 34             | NA                                                       | 928.79                                                |
| 35             | NA                                                       | 961.15                                                |
| 36             | NA                                                       | 994.63                                                |
| 37             | NA                                                       | 1029.28                                               |
| 38             | NA                                                       | 1065.14                                               |
| 39             | NA                                                       | 1102.25                                               |
| 40             | NA                                                       | 1140.65                                               |
| 41             | NA                                                       | 1180.39                                               |
| 42             | NA                                                       | 1221.51                                               |
| 43             | NA                                                       | 1264.07                                               |
| 44             | NA                                                       | 1308.11                                               |
| 45             | NA                                                       | 1353.68                                               |
| 46             | NA                                                       | 1400.84                                               |
| 47             | NA                                                       | 1449.65                                               |
| 48             | NA                                                       | 1500.15                                               |

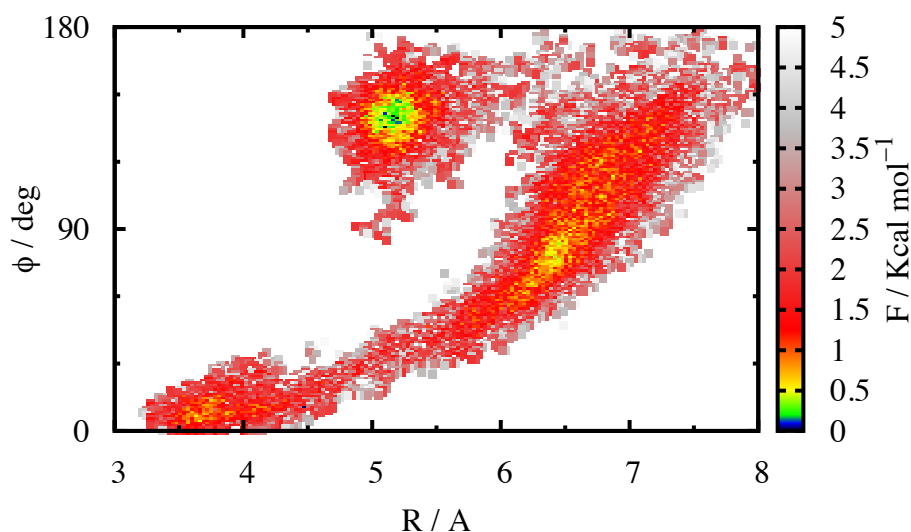

**Figure S1.** Zoom-in of the free energy landscape for dithiacyclophane.

**Table S2.** Relative electronic or free energies (in kcal/mol) of dithiacyclophane conformers determined from static computations or REMD simulations. Static values are taken from the DFTB3/3OB-UFF//M06-2X/def2-TZVP, M06-2X/def2-TZVP and PBE0-dDsC/def2-TZVP//M06-2X/def2-TZVP levels respectively. Free energy contributions are given at 300 K.

|                          | DFTB3/3OB-UFF     |                               | M06-2X            |                                 | PBE0-dDsC         |                                 |
|--------------------------|-------------------|-------------------------------|-------------------|---------------------------------|-------------------|---------------------------------|
|                          | Electronic Energy | REMD Free Energy <sup>a</sup> | Electronic Energy | Static Free Energy <sup>b</sup> | Electronic Energy | Static Free Energy <sup>b</sup> |
| <b>1. Closed</b>         | 1.96              | 0.68                          | 2.19              | 2.77                            | 3.75              | 4.34                            |
| <b>2. Open</b>           | 1.61              | 0.19                          | 1.77              | 1.00                            | 2.38              | 1.61                            |
| <b>3. Disarticulated</b> | 0.00              | 0.00                          | 0.00              | 0.00                            | 0.00              | 0.00                            |

<sup>a</sup>The free energy of a basin  $i$  is computed evaluating the following integral:

$$F_i = k_B T \log \int_{N_i} e^{-F(x)/k_B T} dx$$

where each of the non-overlapping integration regions ( $N_i$ ) covers a neighborhood of the local free-energy minima. The equation makes it possible to account for the thermal fluctuations that distort in a different manner the geometry of the various configurations.

<sup>b</sup>The estimation of the static free energy is based on the harmonic approximation as provided by most quantum chemistry codes although not by DFBT<sup>+</sup>.

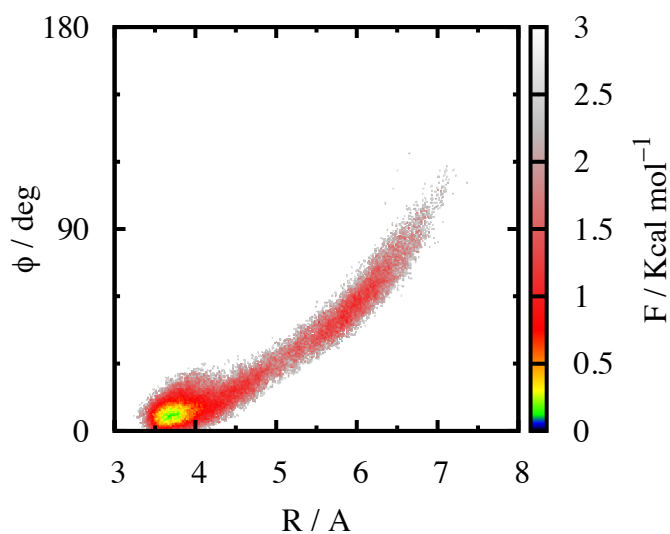

**Figure S2.** Free energy map for a standard MD simulation of dithiaparacyclophane. Note that the region associated with the “disarticulated” structure has not been found.

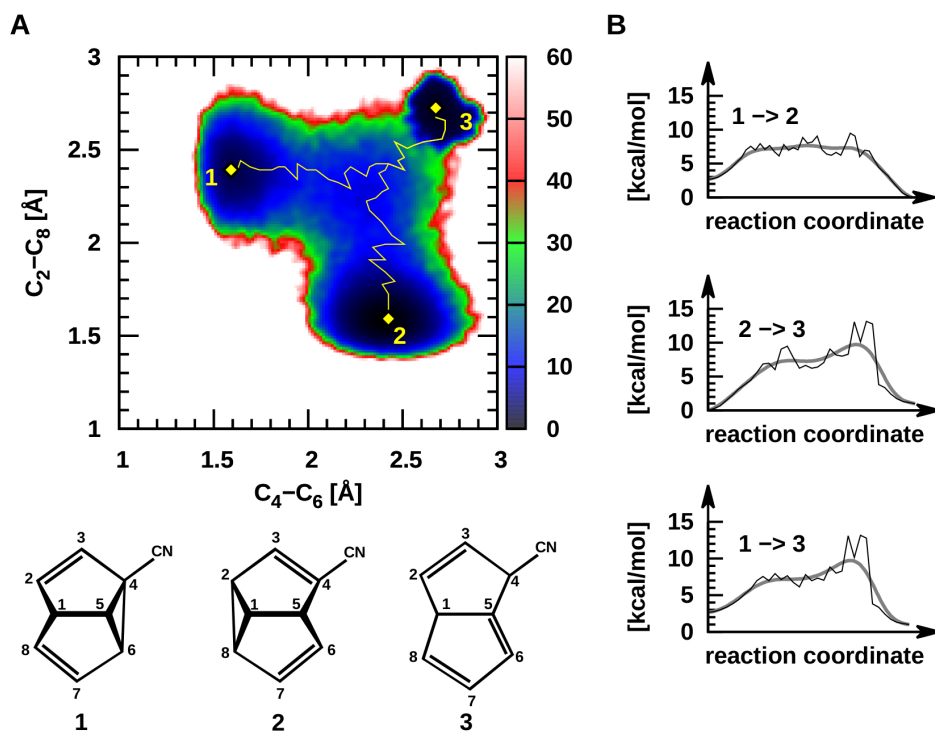

**Figure S3.** Cope rearrangement for CN substituted (C4) semibullvalene. **A:** Free energy map obtained from REMD@DFTB3 simulations indicating the expected Cope rearrangement (minimum energy pathway,  $1 \leftrightarrow 2$ , given in yellow) as well as an unexpected region corresponding to opening of the semibullvalenes structure to give dihydropentalene ( $1 \leftrightarrow 3$ ,  $2 \leftrightarrow 3$ ). **B:** Minimum energy pathways between the stable conformations presented in S3A.

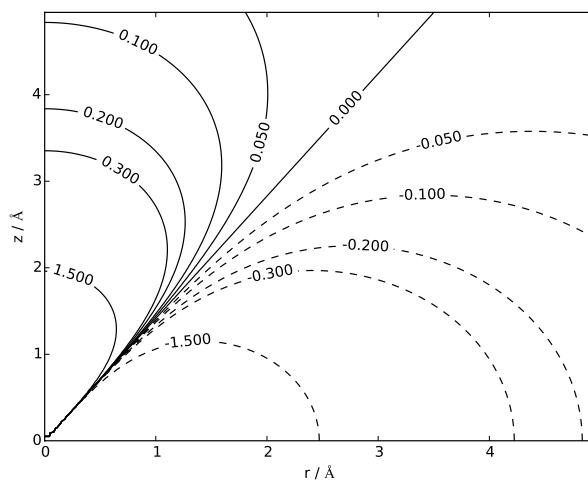

**Figure S4.** Pople ring current model map.

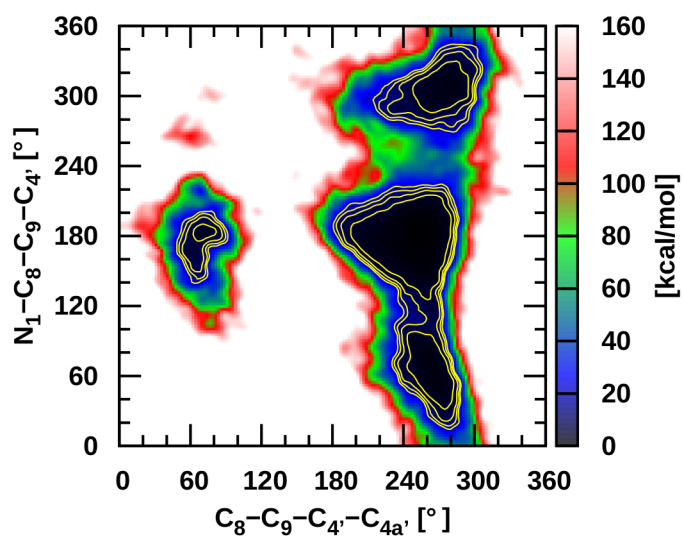

**Figure S5.** Free energy map of the diastereomer of the cinchona alkaloid catalyst. As expected, this map is the mirror of the map presented in Figure 6.

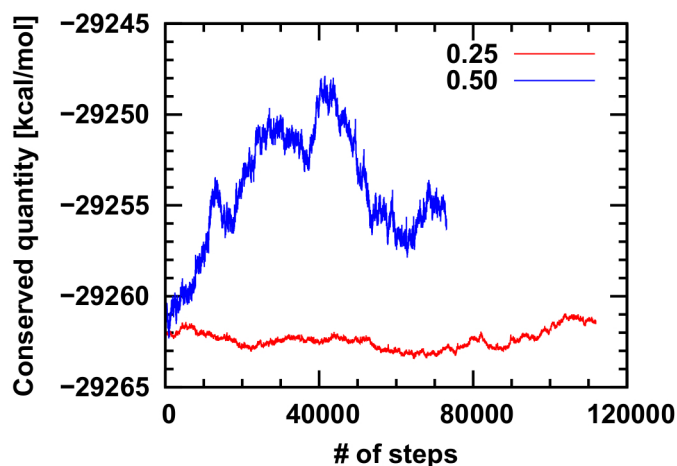

**Figure S6.** The energy conservation over simulation time at two different time steps (0.25 fs in red and 0.50 fs in blue) at 1500 K for the dithiacyclophane example.

### Cartesian Coordinates of Relevant Structure

40

Dithiacyclophane (1, Closed Configuration)

|   |          |          |          |
|---|----------|----------|----------|
| C | -1.02184 | -2.39924 | 0.87577  |
| C | -1.63316 | -1.80133 | -0.22393 |
| C | -0.84692 | -1.39415 | -1.29582 |
| C | 0.53432  | -1.56442 | -1.28795 |
| C | 1.12024  | -2.19775 | -0.20046 |
| C | 0.34608  | -2.61006 | 0.87727  |
| H | -1.62173 | -2.68595 | 1.73175  |
| H | -1.31456 | -0.91987 | -2.15186 |
| H | 2.19320  | -2.34620 | -0.18076 |
| H | 0.82001  | -3.07799 | 1.73098  |
| C | 1.39862  | -1.12018 | -2.44450 |
| H | 1.40916  | -1.89559 | -3.21434 |
| H | 2.42940  | -0.98879 | -2.11223 |
| C | -3.11240 | -1.55482 | -0.24307 |
| H | -3.46323 | -1.38426 | -1.26059 |
| H | -3.65898 | -2.40622 | 0.16314  |
| S | 0.88183  | 0.36311  | -3.34888 |
| S | -3.63526 | -0.15539 | 0.80294  |
| C | 1.50958  | 1.74537  | -2.36120 |
| H | 2.58996  | 1.64771  | -2.25414 |
| H | 1.34105  | 2.59554  | -3.02377 |
| C | -2.65112 | 1.19006  | 0.08638  |
| H | -3.32694 | 1.88475  | -0.41215 |
| H | -2.00011 | 0.75371  | -0.66915 |
| C | -1.82533 | 1.94567  | 1.13303  |
| H | -1.37912 | 2.81898  | 0.64973  |
| H | -2.50273 | 2.33115  | 1.89742  |
| C | 0.82538  | 2.01206  | -1.02056 |
| H | -0.24095 | 1.81615  | -1.13497 |
| H | 0.91954  | 3.07948  | -0.79224 |
| C | 1.35830  | 1.23278  | 0.15219  |
| C | 2.63617  | 0.78432  | 0.26872  |
| C | 0.58911  | 0.90825  | 1.32630  |
| H | 3.44299  | 0.89095  | -0.43841 |
| C | 1.34371  | 0.20492  | 2.24871  |
| C | -0.75037 | 1.14157  | 1.80910  |
| C | -0.93072 | 0.57000  | 3.02727  |
| S | 2.95923  | -0.04300 | 1.74962  |
| S | 0.46634  | -0.22981 | 3.64960  |
| H | -1.83428 | 0.58380  | 3.61656  |

40

Dithiacyclphane (2, Open Configuration)

|   |          |          |          |
|---|----------|----------|----------|
| C | 1.08766  | 2.41122  | -1.74663 |
| C | 0.14248  | 1.79029  | -2.55975 |
| C | 0.41796  | 0.52739  | -3.06956 |
| C | 1.60804  | -0.12654 | -2.77083 |
| C | 2.53954  | 0.50819  | -1.95385 |
| C | 2.28239  | 1.77413  | -1.44693 |
| H | 0.87714  | 3.39167  | -1.33562 |
| H | -0.33416 | 0.01731  | -3.66314 |
| H | 3.46916  | 0.00631  | -1.71182 |
| H | 3.00869  | 2.25892  | -0.80773 |
| C | 1.86193  | -1.52101 | -3.26656 |
| H | 2.89258  | -1.81392 | -3.06654 |
| H | 1.69496  | -1.59381 | -4.34197 |
| C | -1.19120 | 2.43701  | -2.80858 |
| H | -1.19990 | 3.46165  | -2.43664 |
| H | -1.42648 | 2.46375  | -3.87310 |
| S | 0.74384  | -2.77352 | -2.55927 |
| S | -2.56733 | 1.50581  | -2.06585 |
| C | 0.94392  | -2.45354 | -0.78423 |
| H | 0.96575  | -3.42843 | -0.29564 |
| H | 1.91838  | -1.98643 | -0.62935 |
| C | -2.03790 | 1.49098  | -0.33483 |
| H | -2.21235 | 2.46612  | 0.12307  |
| H | -0.96605 | 1.29246  | -0.30060 |
| C | -2.79158 | 0.40424  | 0.43484  |
| H | -3.84101 | 0.68454  | 0.53815  |
| H | -2.76312 | -0.52326 | -0.13922 |
| C | -0.17370 | -1.59419 | -0.20513 |
| H | -1.12640 | -2.09690 | -0.39328 |
| H | -0.22014 | -0.65187 | -0.75653 |
| C | -0.03704 | -1.32235 | 1.26827  |
| C | 0.96044  | -1.80111 | 2.05686  |
| C | -0.96770 | -0.53840 | 2.04285  |
| H | 1.79391  | -2.41776 | 1.76070  |
| C | -0.61270 | -0.48920 | 3.37786  |
| C | -2.18145 | 0.19480  | 1.79012  |
| C | -2.67034 | 0.73929  | 2.93350  |
| S | 0.82389  | -1.35288 | 3.72161  |
| S | -1.71259 | 0.40910  | 4.33347  |
| H | -3.56342 | 1.33625  | 3.03707  |

40

Dithiacyclophane (3, Disarticulated Configuration)

|   |          |          |          |
|---|----------|----------|----------|
| C | -1.21395 | -0.05493 | -2.57969 |
| C | -1.67637 | -0.06526 | -1.26900 |
| C | -1.07129 | -0.91514 | -0.34725 |
| C | 0.00620  | -1.71916 | -0.70127 |
| C | 0.45673  | -1.69616 | -2.01838 |
| C | -0.16141 | -0.87990 | -2.95387 |
| H | -1.66715 | 0.61542  | -3.30055 |
| H | -1.43198 | -0.92846 | 0.67657  |
| H | 1.30624  | -2.30648 | -2.30097 |
| H | 0.18930  | -0.87370 | -3.97793 |
| C | 0.69992  | -2.54088 | 0.34634  |
| H | 0.81089  | -3.57750 | 0.02420  |
| H | 0.13459  | -2.53272 | 1.27761  |
| C | -2.73417 | 0.88776  | -0.80603 |
| H | -3.53651 | 0.97785  | -1.53887 |
| H | -3.16017 | 0.55410  | 0.13806  |
| S | 2.41988  | -2.01452 | 0.65539  |
| S | -2.12239 | 2.60853  | -0.64287 |
| C | 2.24504  | -0.24897 | 1.02292  |
| H | 3.16222  | 0.21089  | 0.65386  |
| H | 1.42185  | 0.14272  | 0.42417  |
| C | -0.48003 | 2.42923  | 0.10100  |
| H | 0.08474  | 3.27392  | -0.29580 |
| H | -0.02462 | 1.52615  | -0.30301 |
| C | -0.40628 | 2.46970  | 1.63310  |
| H | 0.64786  | 2.47937  | 1.91494  |
| H | -0.82550 | 3.42049  | 1.96681  |
| C | 2.06239  | 0.08624  | 2.50727  |
| H | 2.13414  | 1.16846  | 2.63524  |
| H | 2.89011  | -0.35167 | 3.06672  |
| C | 0.77116  | -0.42788 | 3.06974  |
| C | 0.70733  | -1.60095 | 3.75094  |
| C | -0.54037 | 0.15471  | 2.90869  |
| H | 1.53646  | -2.24921 | 3.98907  |
| C | -1.51378 | -0.65169 | 3.47901  |
| C | -1.11931 | 1.35394  | 2.34829  |
| C | -2.46393 | 1.38184  | 2.54514  |
| S | -0.88966 | -2.07121 | 4.20240  |
| S | -3.09154 | -0.00304 | 3.35812  |
| H | -3.14005 | 2.16180  | 2.22919  |



16

Semibullvalene (Reactant/Product)

|   |          |          |          |
|---|----------|----------|----------|
| C | -0.36223 | 1.23397  | -1.22210 |
| C | -0.93186 | -0.17916 | -1.25801 |
| C | -0.12162 | -1.02424 | -0.61783 |
| C | 1.12574  | -0.35494 | -0.20982 |
| C | 1.11024  | 1.00999  | -0.81704 |
| C | 1.08060  | 0.94889  | 0.67541  |
| C | -0.20922 | 1.51499  | 1.10633  |
| C | -0.99887 | 1.75951  | 0.05871  |
| H | -0.52972 | 1.83342  | -2.11406 |
| H | -1.93829 | -0.39681 | -1.58963 |
| H | -0.35592 | -2.05116 | -0.37387 |
| H | 2.04454  | -0.91603 | -0.11548 |
| H | 1.93718  | 1.42010  | -1.37832 |
| H | 1.97537  | 1.11020  | 1.25959  |
| H | -0.48373 | 1.65638  | 2.14251  |
| H | -2.02464 | 2.09988  | 0.10611  |

16

Semibullvalene Cope Rearrangement TS

|   |          |          |          |
|---|----------|----------|----------|
| C | -0.30099 | 1.26151  | -1.25953 |
| C | -0.98066 | -0.06307 | -1.12022 |
| C | -0.10143 | -1.01473 | -0.63270 |
| C | 1.14998  | -0.45941 | -0.42856 |
| C | 1.14871  | 0.99189  | -0.78873 |
| C | 1.09301  | 1.19130  | 0.69218  |
| C | -0.18912 | 1.52608  | 1.09238  |
| C | -1.03762 | 1.58727  | 0.00028  |
| H | -0.46166 | 1.86055  | -2.15001 |
| H | -2.00536 | -0.23077 | -1.41198 |
| H | -0.38157 | -2.01757 | -0.34435 |
| H | 2.03451  | -0.98220 | -0.10062 |
| H | 1.97264  | 1.40784  | -1.35948 |
| H | 1.96193  | 1.12080  | 1.32721  |
| H | -0.50690 | 1.61394  | 2.12126  |
| H | -2.07791 | 1.87154  | 0.01538  |
